# Supplementary material for: Clinical Characteristics and Contemporary Management of Patients With Cardiomyopathies in Japan ― Report From a National Registry of Clinical Personal Records ―
Source: PubMed Central journal article supplement — Circ Rep. 2021 Feb 11;3(3):142–52. doi: 10.1253/circrep.CR-21-0001 (PMC7956877; doi:10.1253/circrep.cr-21-0001), 2021-02-11
Supplement: circrep-3-142-s001.pdf [file circrep-3-142-s001.pdf]

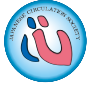

*Circulation Reports*  
*Circ Rep* 2021; **3**: 142–152  
doi:10.1253/circrep.CR-21-0001

**Supplementary File**

---

# **Clinical Characteristics and Contemporary Management of Patients With Cardiomyopathies in Japan**

## **— Report From a National Registry of Clinical Personal Records —**

---

Nobuyuki Enzan, MD; Shouji Matsushima, MD, PhD; Tomomi Ide, MD, PhD;  
Hidetaka Kaku, MD; Takeshi Tohyama, MD, PhD; Kouta Funakoshi, MD; Taiki Higo, MD;  
Hiroyuki Tsutsui, MD, PhD for the Research Group of Idiopathic Cardiomyopathy

**Supplementary Table. Patient Characteristics of This Registry and the ESC Registry**

| Variables                             | DCM                |                 | HCM               |                 | RCM             |               |
|---------------------------------------|--------------------|-----------------|-------------------|-----------------|-----------------|---------------|
|                                       | Japan<br>(n=40537) | ESC<br>(n=1260) | Japan<br>(n=3553) | ESC<br>(n=1739) | Japan<br>(n=46) | ESC<br>(n=66) |
| Enrollment year                       | 2003-2014          | 2012-2016       | 2009-2014         | 2012-2016       | 2009-2014       | 2012-2016     |
| Demographics                          |                    |                 |                   |                 |                 |               |
| Age at enrollment, median (IQR)       | 59 (49-68)         | 55 (45-63)      | 64 (53-73)        | 55 (42-65)      | 54 (41-68)      | 60 (44-69)    |
| Age at diagnosis, median (IQR)        | 54 (44-63)         | 49 (40-58)      | 55 (42-64)        | 47 (33-59)      | 42 (28-63)      | 57 (37-68)    |
| Male                                  | 30230 (74.6)       | 935 (74.2)      | 2087 (58.7)       | 1028 (59.1)     | 28 (60.9)       | 32 (48.5)     |
| Family history of SCD                 | 405 (2.5)          | 132 (11.9)      | 231 (6.5)         | 350 (21.1)      | -               | 8 (13.3)      |
| NYHA class                            |                    |                 |                   |                 |                 |               |
| Class I                               | 9084 (23.8)        | 198 (18.9)      | 873 (27.1)        | 463 (32.7)      | 2 (4.7)         | 11 (17.5)     |
| Class II                              | 18845 (49.3)       | 448 (42.7)      | 1986 (61.6)       | 707 (49.9)      | 16 (37.2)       | 26 (41.3)     |
| Class III                             | 7649 (20.0)        | 316 (30.1)      | 319 (9.9)         | 228 (16.1)      | 17 (39.5)       | 25 (39.7)     |
| Class IV                              | 2628 (6.9)         | 87 (8.3)        | 45 (1.4)          | 19 (1.3)        | 8 (18.6)        | 1 (1.6)       |
| Arrhythmia                            |                    |                 |                   |                 |                 |               |
| Atrial fibrillation                   | 9218 (22.7)        | 356 (28.3)      | 971 (27.3)        | 463 (26.6)      | 23 (50.0)       | 32 (48.5)     |
| Ventricular arrhythmia/cardiac arrest | -                  | 61 (4.8)        | 816 (23.0)        | 49 (2.8)*       | -               | 3 (4.5)       |
| Echocardiogram                        |                    |                 |                   |                 |                 |               |
| LVDd                                  | 60.2 ± 9.6         | 64.2 ± 9.8      | 46.1 ± 8.8        | 45.4 ± 6.9      | 47.4 ± 9.4      | 46.6 ± 8.6    |
| LVEF                                  | 38.0 ± 15.0        | 32.5 ± 11.8     | 62.5 ± 15.6       | 62.2 ± 11.4     | 55.2 ± 15.4     | 53.8 ± 10.4   |
| Maximum LV thickness                  | 10.0 ± 2.2         | 10.4 ± 2.1      | 18.9 ± 5.8        | 19.7 ± 5.0      | 11.3 ± 4.9      | 15.1 ± 4.4    |
| Procedures prior to enrollment        |                    |                 |                   |                 |                 |               |
| Pacemaker implanted                   | 1012 (2.5)         | 177 (14.3)      | 180 (5.1)         | 135 (7.8)       | 3 (6.5)         | 8 (12.3)      |
| Septal myectomy                       | -                  | -               | 45 (1.3)          | 85 (4.9)        | -               | -             |

|                                        |              |             |             |             |           |           |
|----------------------------------------|--------------|-------------|-------------|-------------|-----------|-----------|
| Alcohol septal ablation                | -            | -           | 4 (0.1)     | 70 (4.0)    | -         | -         |
| <b>Medications</b>                     |              |             |             |             |           |           |
| Beta-blockers                          | 28069 (69.2) | 1130 (89.7) | 1989 (56.8) | 1294 (74.4) | 27 (64.3) | 42 (63.6) |
| Diuretics, oral                        | 27905 (71.7) | 89.5 (71.8) | 1058 (29.8) | 491 (31.4)  | 15 (32.6) | 53 (85.5) |
| ACEi                                   | 15683 (38.7) | 917 (72.8)  | 530 (14.9)  | 342 (19.7)  | 13 (28.3) | 15 (22.7) |
| ARB                                    | 15699 (38.7) | 210 (16.7)  | 1306 (36.8) | 265 (15.2)  | 15 (32.6) | 7 (10.6)  |
| Mineralocorticoid receptor antagonists | 12734 (31.4) | 795 (63.1)  | 554 (15.6)  | 233 (13.4)  | 10 (21.7) | 30 (45.5) |
| Antiarrhythmic drugs                   | 7834 (19.3)  | 361 (28.7)  | 1470 (41.4) | 264 (15.2)  | 6 (13.0)  | 12 (18.2) |

\* The ESC registry includes “resuscitated” ventricular fibrillation/cardiac arrest. In the clinical personal record, this variable does not necessitate resuscitation effort.

Data are shown as n (percent), means  $\pm$  SD, or median (IQR) otherwise specified.

DCM, dilated cardiomyopathy; HCM, hypertrophic cardiomyopathy; RCM, restrictive cardiomyopathy; ESC, European Society of Cardiology; SCD, sudden cardiac death; NYHA, New York Heart Association; LVDd, left ventricular diastolic diameter; LVEF, left ventricular ejection fraction; LV, left ventricular; ACEi, angiotensin-converting-enzyme inhibitor; ARB, angiotensin-receptor-blocker; MRA, mineralocorticoid receptor antagonist.

## **The Research Group of Idiopathic Cardiomyopathy**

Department of Cardiovascular Medicine, Faculty of Medical Sciences, Kyushu University: Ichiro Sakamoto, M.D., Toru Hashimoto, M.D., Ph.D., Takeo Fujino, M.D., Ph.D., Shintaro Kinugawa., M.D., Ph.D.

Department of Cardiovascular Surgery, Kyushu University Hospital: Akira Shiose, M.D., Ph.D.

Department of Cardiovascular Medicine, Hokkaido University Graduate School of Medicine: Toshiyuki Nagai, M.D., Ph.D., Toshihisa Anzai, M.D., Ph.D.

Department of Cardiovascular and Thoracic Surgery, Hokkaido University Graduate School of Medicine: Satoru Wakasa, M.D., Ph.D.

Division of Cardiovascular Surgery, Tohoku University Graduate School of Medicine: Yoshikatsu Saiki, M.D., Ph.D.

Department of Cardiology, Pulmonology, and Nephrology, Yamagata University Faculty of Medicine: Wanezaki Masahiro, M.D., Ph.D., Masafumi Watanabe, M.D., Ph.D.

Department of Cardiovascular Medicine, Fukushima Medical University: Akiomi Yoshihisa, M.D., Ph.D., Yasuchika Takeishi, M.D., Ph.D.

International University of Health and Welfare Graduate School: Hiroaki Shimokawa, M.D., Ph.D.

Department of Cardiovascular Medicine, Graduate School of Medicine, The University of Tokyo: Katsura Soma, M.D., Ph.D., Masaru Hatano, M.D., Ph.D., Issei Komuro, M.D., Ph.D.

Department of Cardiovascular Medicine, The University of Tokyo Hospital: Atsushi Yao, M.D., Ph.D.

Department of Cardiac Surgery, Graduate School of Medicine, The University of Tokyo: Minoru Ono, M.D., Ph.D.

Department of Cardiovascular Surgery, Chiba University Graduate School of Medicine: Goro Matsumiya, M.D., Ph.D.

Department of Cardiology, Keio University School of Medicine: Shun Kohsaka, M.D., Ph.D., Keiichi Fukuda, M.D., Ph.D.

Division of Cardiology, Department of Internal Medicine, The Jikei University School of Medicine: Makoto Kawai, M.D., Ph.D., Michihiro Yoshimura, M.D., Ph.D.

Department of Cardiology, Nagoya University Graduate School of Medicine: Takahiro Okumura, M.D., Ph.D., Toyoaki Murohara, M.D., Ph.D.

Department of Cardiac Surgery, Nagoya University Graduate School of Medicine: Akihiko Usui, M.D., Ph.D.

Department of Cardiovascular Medicine, Kanazawa University Graduate School of Medical Sciences: Akihiro Nomura, M.D., Ph.D., Noboru Fujino, M.D., Ph.D.

Department of Cardiovascular Medicine, Kyoto University Graduate School of Medicine: Takeru Makiyama, M.D., Ph.D., Takeshi Kimura, M.D., Ph.D.

Department of Cardiovascular Medicine, Osaka University Graduate School of Medicine: Tomohito Ohtani, M.D., Ph.D., Yasushi Sakata, M.D., Ph.D.

Department of Cardiovascular Surgery Osaka University Graduate School of Medicine: Yoshiki Sawa, M.D., Ph.D.

Department of Cardiovascular Medicine, National Cerebral and Cardiovascular Center: Atsushi Okada, M.D., Ph.D., Chisato Izumi, M.D., Ph.D.

Department of Clinical Research and Development, National Cerebral and Cardiovascular Center: Masafumi Kitakaze, M.D., Ph.D.

Department of Obstetrics and Gynecology, National Cerebral and Cardiovascular Center: Chizuko A Kamiya, M.D., Ph.D., Jun Yoshimatsu, M.D., Ph.D.

Department of Cardiovascular Medicine, Nara Medical University: Kenji Onoue, M.D., Ph.D., Yoshihiko Saito, M.D., Ph.D.

Department of Cardiology and Geriatrics, Kochi Medical School, Kochi University: Toru Kubo, M.D., Ph.D., Hiroaki Kitaoka, M.D., Ph.D.

Department of Pediatrics, Kagoshima Medical Center: Masao Yoshinaga, M.D., Ph.D., Yuji Tanaka, M.D., Ph.D.
